# Supplementary material
Source: publisher figshare collection journal article supplement (https://acs.figshare.com/ndownloader/files/3949228)
Supplement: Supplementary file 1 [file 3949228]

## Supporting Information

# A Near-infrared Light-triggered Drug Delivery Vehicle for Mitochondria-targeted Chemo-photothermal Therapy

*Enguo Ju,<sup>a,b</sup> Zhenhua Li,<sup>a,b</sup> Zhen Liu,<sup>a,b</sup> Jinsong Ren<sup>\*a</sup> and Xiaogang Qu<sup>a</sup>*

<sup>a</sup> Division of Biological Inorganic Chemistry, State Key Laboratory of Rare Earth Resource Utilization, Laboratory of Chemical Biology, Changchun Institute of Applied Chemistry, Chinese Academy of Sciences, Changchun, 130022, P. R. China.

<sup>b</sup> Graduate School of the Chinese Academy of Sciences, Beijing, 100039, P. R. China

\* To whom correspondence should be addressed. Email: jren@ciac.jl.cn

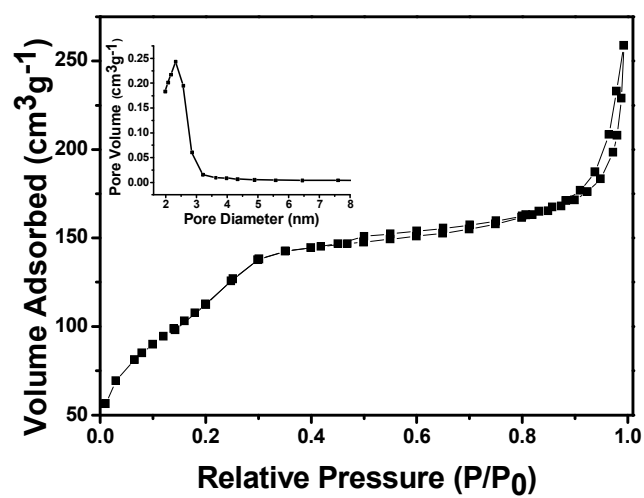

Figure S1. N<sub>2</sub> adsorption-desorption isotherms (inset: the pore diameter distribution) for AuMPs.

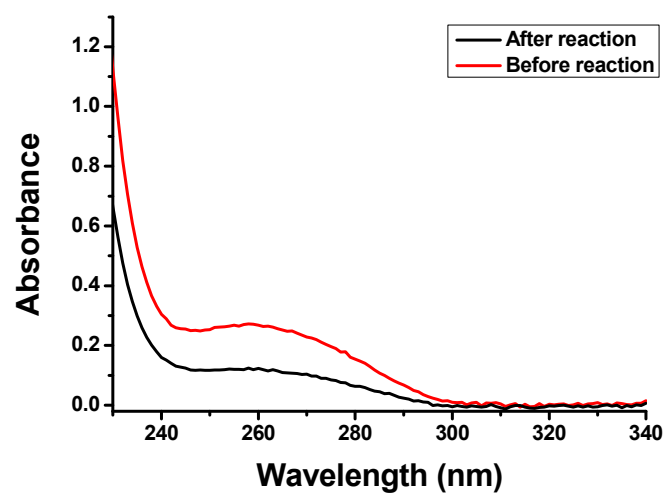

Figure S2. The UV/Vis spectrum of the DNA aptamer solution before reaction and after reaction.

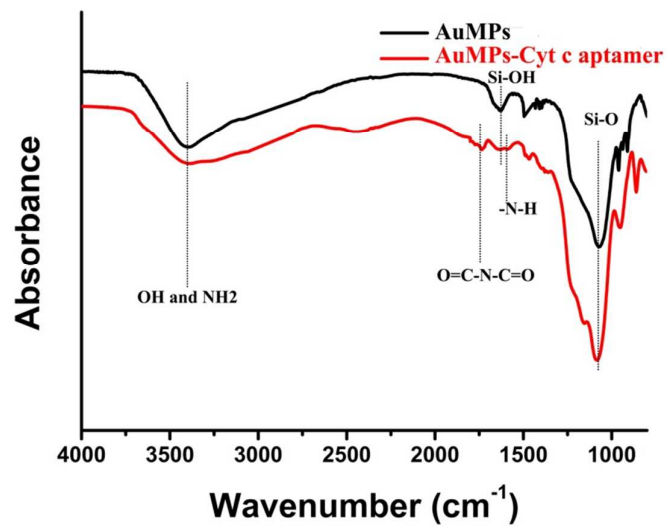

Figure S3. FT-IR spectra of AuMPs and AuMPs-Cyt c aptamer.

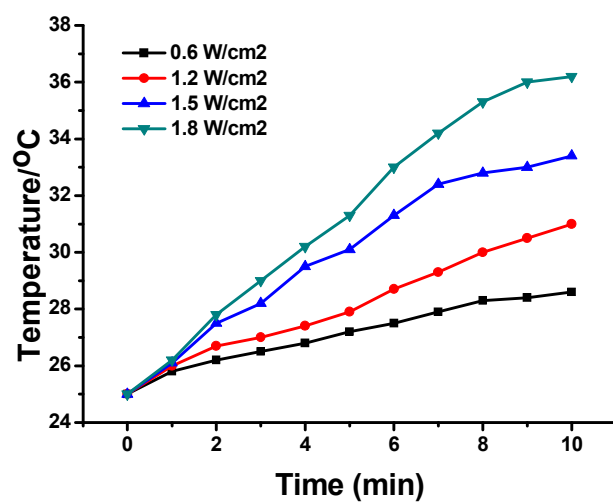

Figure S4. Plots of temperature increase for AuMPs-Cyt c aptamer as a function of irradiation time under NIR diode laser irradiation (808nm) with powers of 0.6 W/cm<sup>2</sup>, 1.2 W/cm<sup>2</sup>, 1.5 W/cm<sup>2</sup> and 1.8 W/cm<sup>2</sup>.

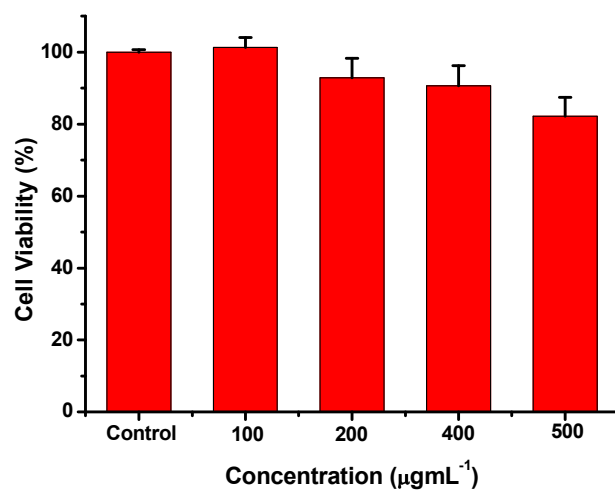

Figure S5. The cell viability of AuMPs incubated with Hela cells.

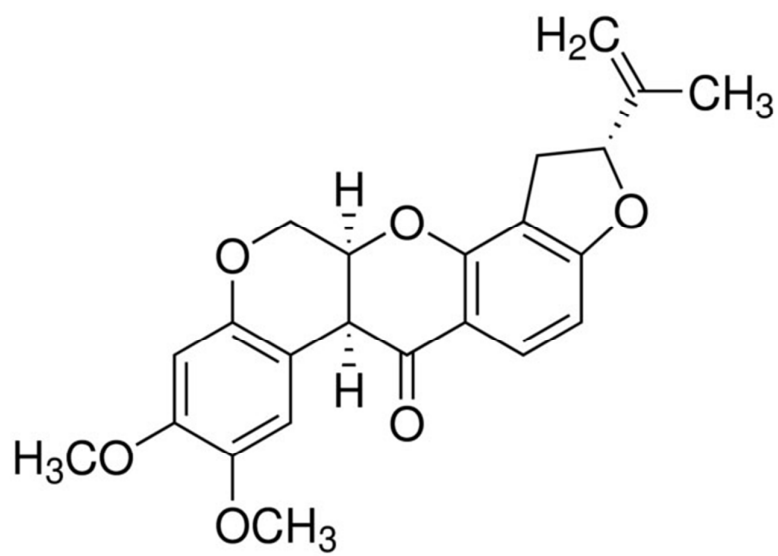

Figure S6. Chemical structure of rotenone.

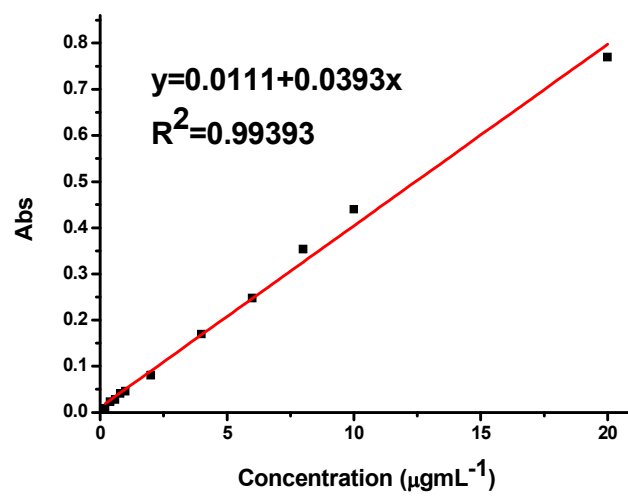

Figure S7. Standard linear calibration curve of rotenone.
